# Supplementary material for: Expanded Ligands Based upon Iron(II) Coordination Compounds of Asymmetrical Bis(terpyridine) Domains
Source: MDPI journal article supplement (doi:10.3390/molecules28010082), 2022-12-22
Supplement: s1 [file s1]

# Supporting Material

## Expanded Ligands Based upon Iron(II) Coordination Compounds of Asymmetrical bis(terpyridine) Domains

Dalila Rocco, Alessandro Prescimone, Catherine E. Housecroft\* and Edwin C. Constable

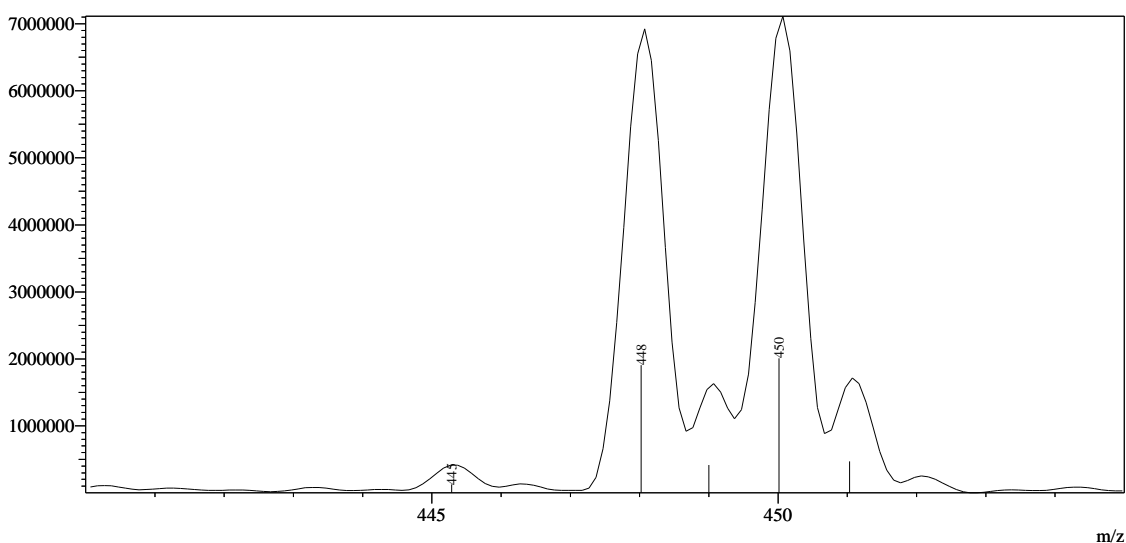

Figure S1. Base peak in the electrospray mass spectrum of **1**.

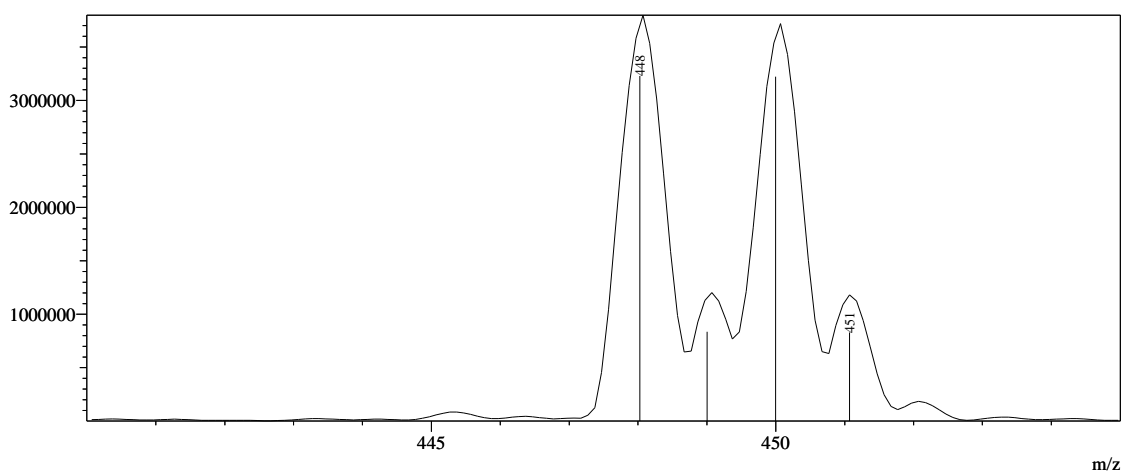

Figure S2. Base peak in the electrospray mass spectrum of **3**.

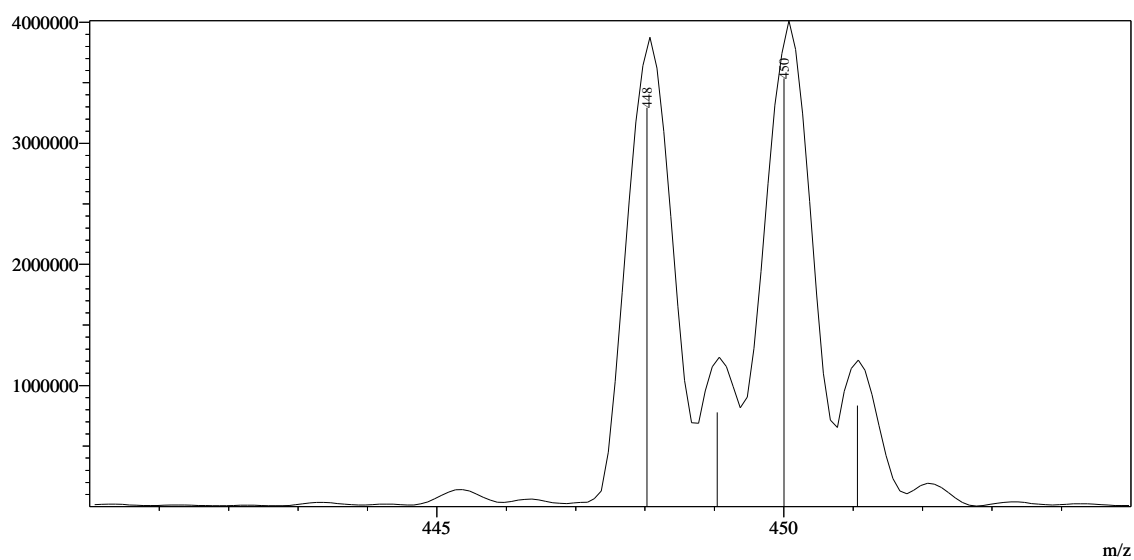

Figure S3. Base peak in the electrospray mass spectrum of **4**.

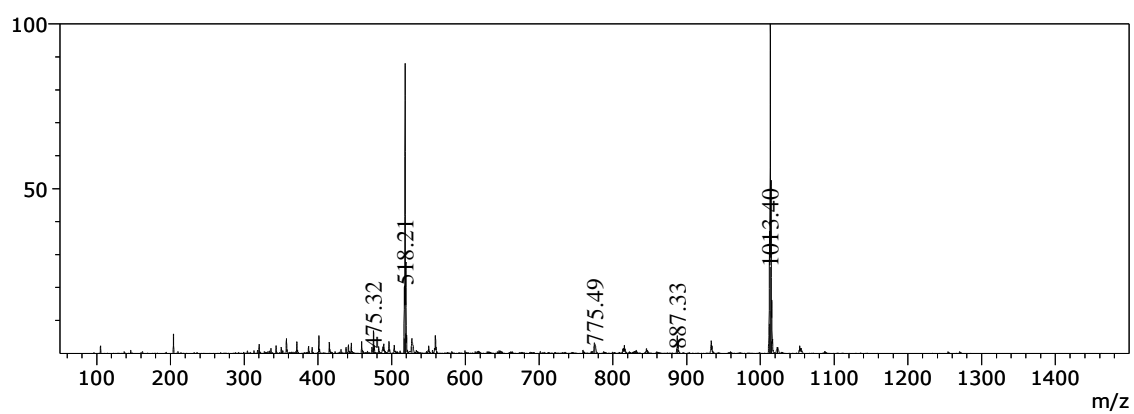

Figure S4. The electrospray mass spectrum of **2**.

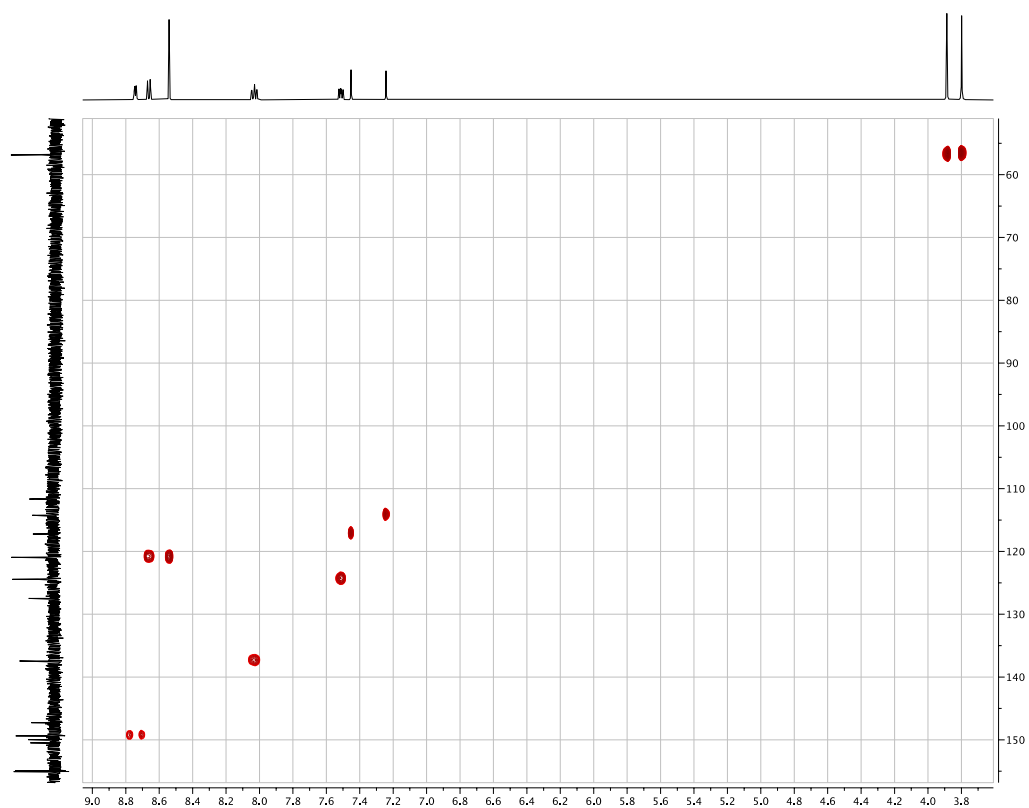

Figure S5. HMQC spectrum of **1** ( $^1\text{H}$  500 MHz,  $^{13}\text{C}$  126 MHz,  $\text{DMSO-}d_6$ , 298 K).

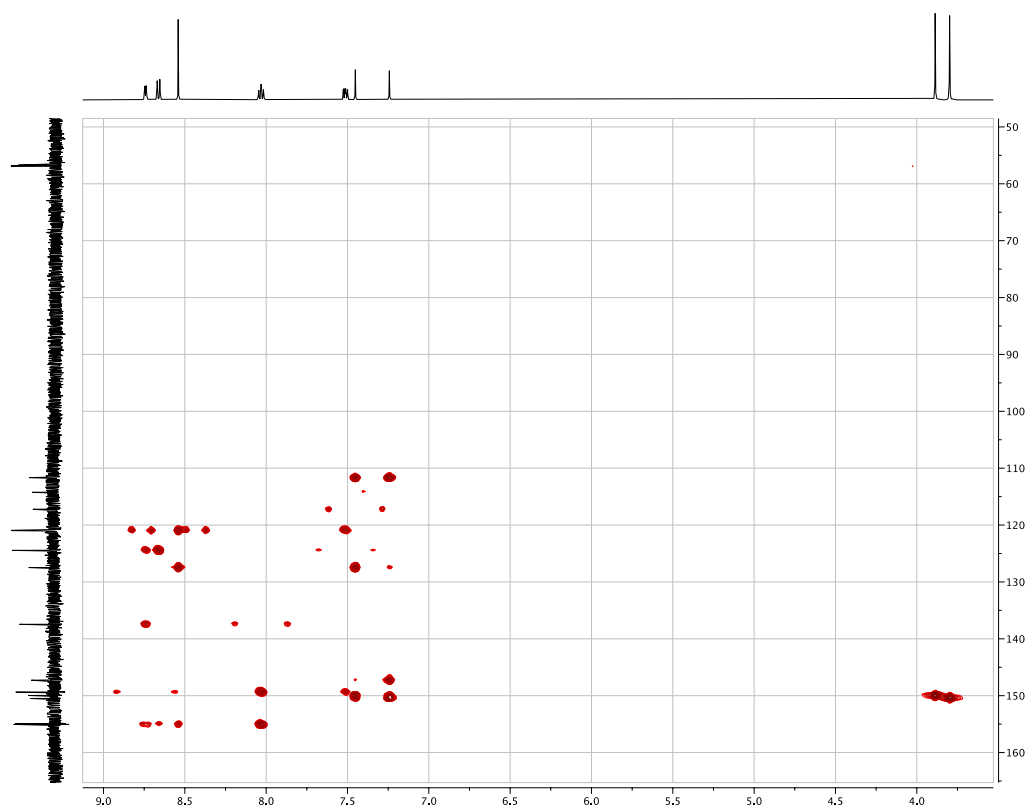

Figure S6. HMBC spectrum of **1** ( $^1\text{H}$  500 MHz,  $^{13}\text{C}$  126 MHz,  $\text{DMSO-}d_6$ , 298 K).

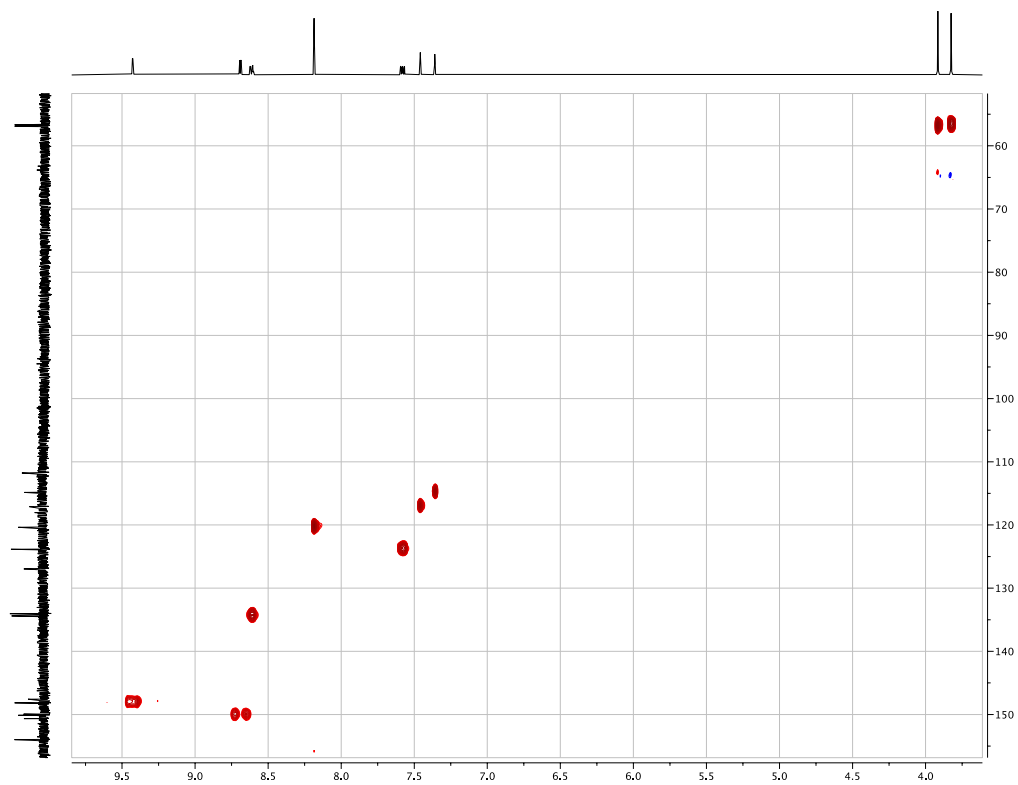

Figure S7. HMQC spectrum of **3** ( $^1\text{H}$  500 MHz,  $^{13}\text{C}$  126 MHz,  $\text{DMSO-}d_6$ , 298 K).

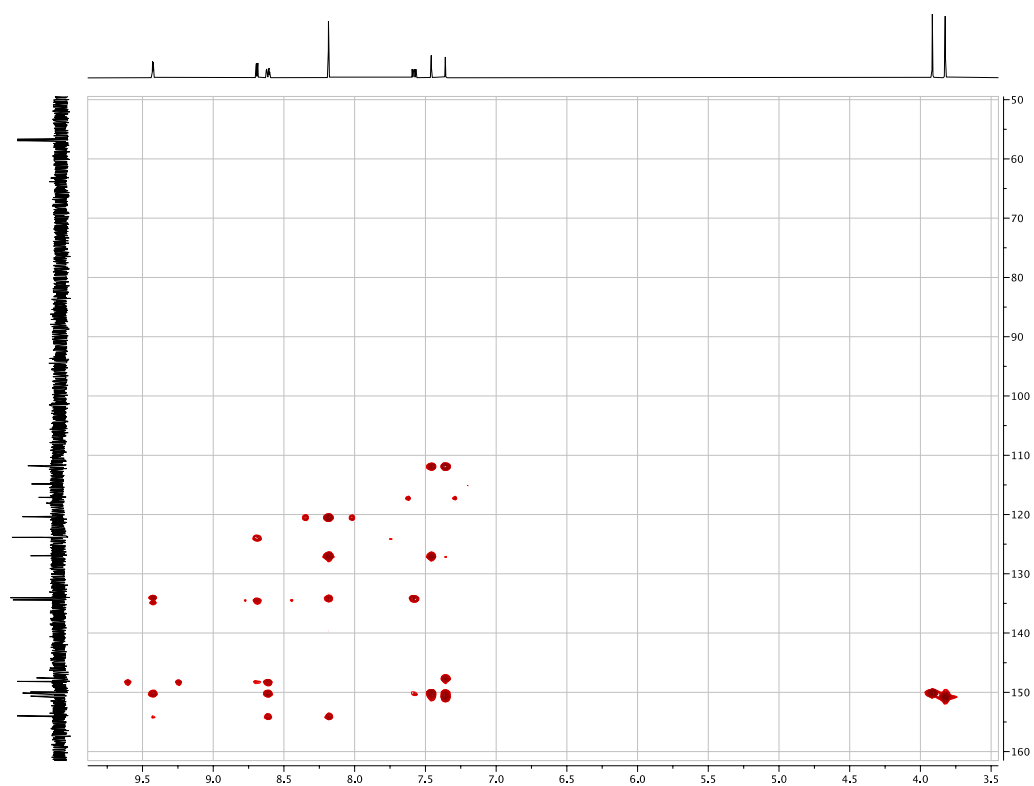

Figure S8. HMBC spectrum of **3** ( $^1\text{H}$  500 MHz,  $^{13}\text{C}$  126 MHz,  $\text{DMSO-}d_6$ , 298 K).

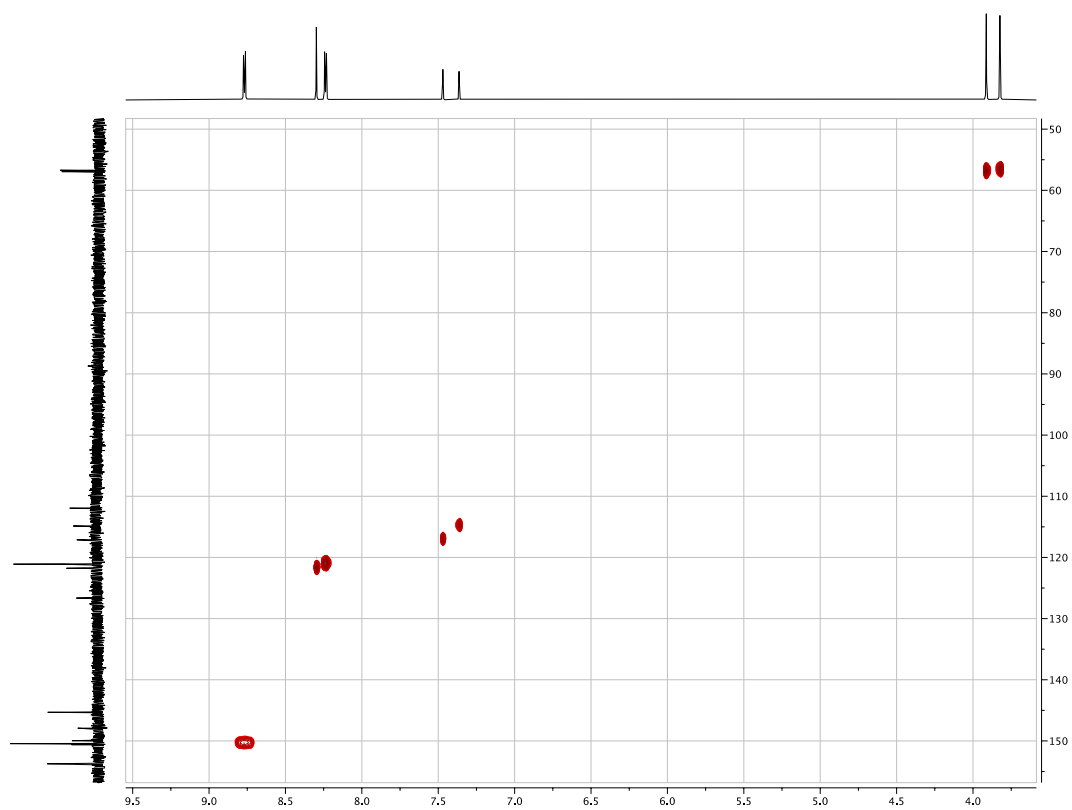

Figure S9. HMQC spectrum of **4** ( $^1\text{H}$  500 MHz,  $^{13}\text{C}$  126 MHz,  $\text{DMSO-}d_6$ , 298 K).

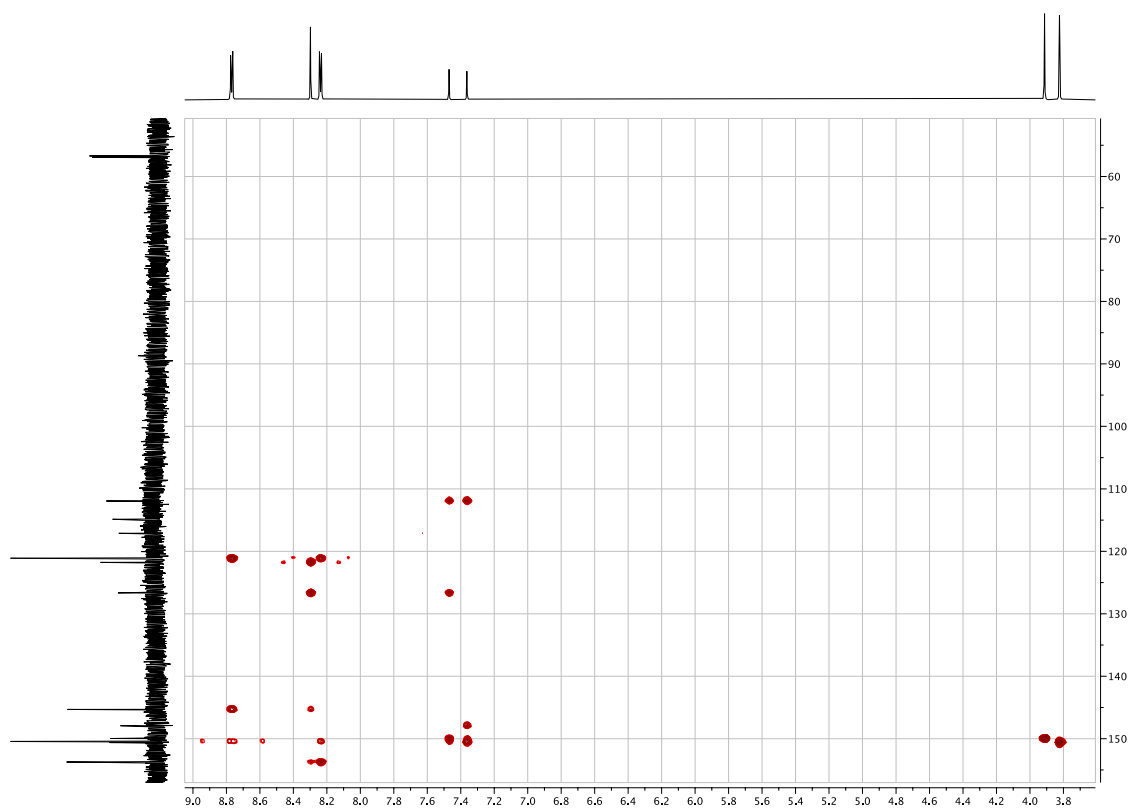

Figure S10. HMBC spectrum of **4** ( $^1\text{H}$  500 MHz,  $^{13}\text{C}$  126 MHz,  $\text{DMSO-}d_6$ , 298 K).

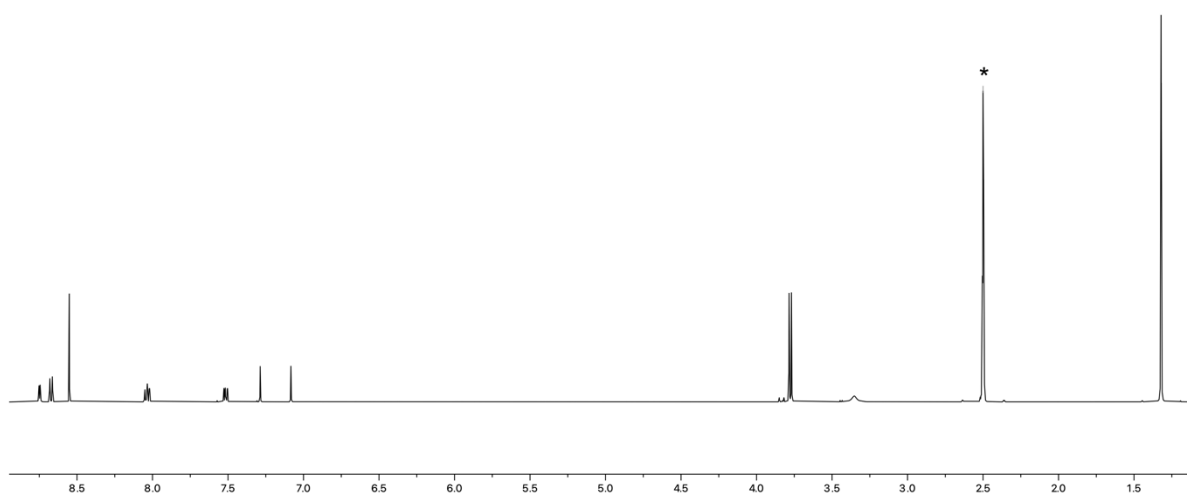

Figure S11.  $^1\text{H}$  NMR spectrum of **2** ( $^1\text{H}$  500 MHz  $\text{DMSO-}d_6$ , 298 K). \* = residual  $\text{DMSO-}d_5$ .

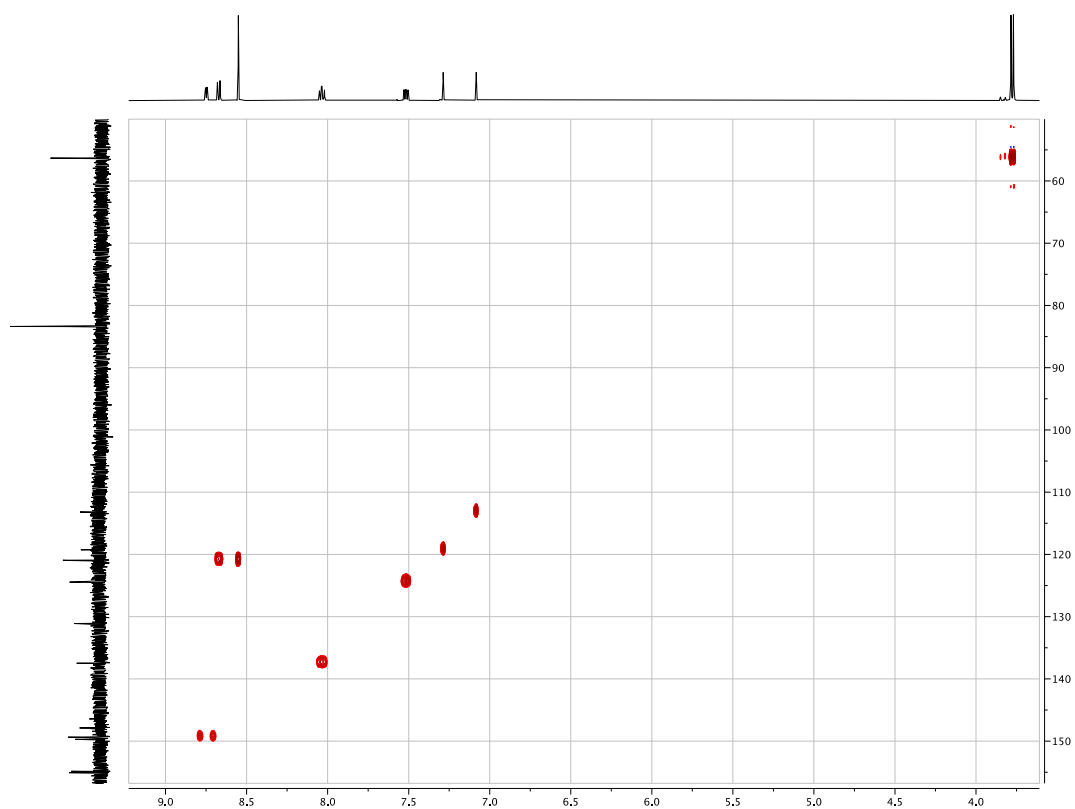

Figure S12. HMQC spectrum of **2** ( $^1\text{H}$  500 MHz,  $^{13}\text{C}$  126 MHz,  $\text{DMSO-}d_6$ , 298 K).

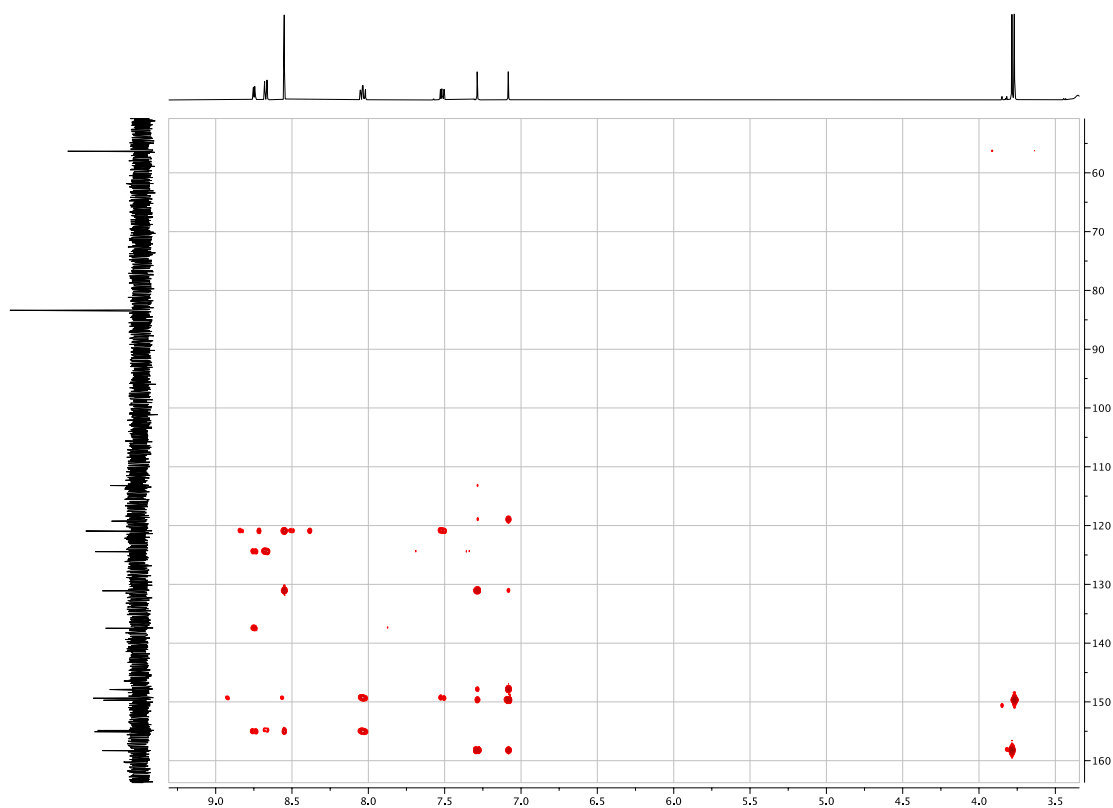

Figure S13. HMBC spectrum of **2** ( $^1\text{H}$  500 MHz,  $^{13}\text{C}$  126 MHz,  $\text{DMSO-}d_6$ , 298 K).

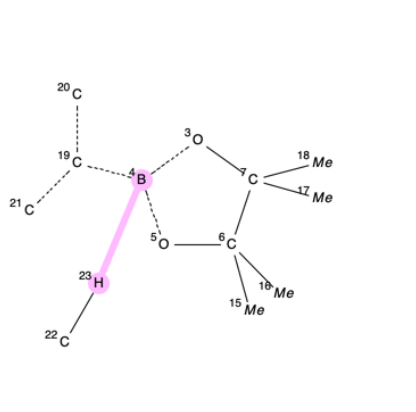

Figure S14. The search motif used in Conquest (version 2022.2.0) [1]. Both B and C(19) were defined as 3-coordinate; --- = any bond type; normalized H coordinates were applied. The H...B contact was defined as  $\leq$  sum of the van der Waals radii.

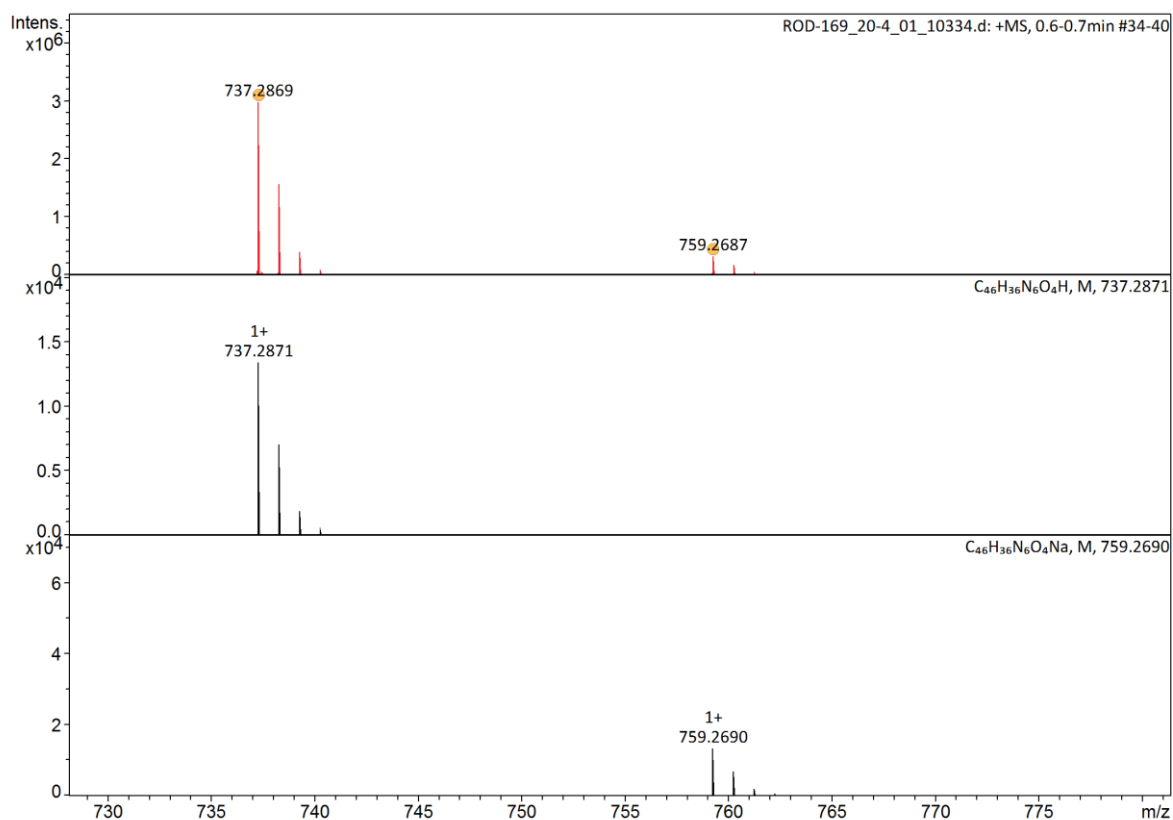

Figure S15. The  $[M+H]^+$  and  $[M+Na]^+$  peaks in the high resolution electrospray mass spectrum of 5. Top, experimental; bottom, simulated.

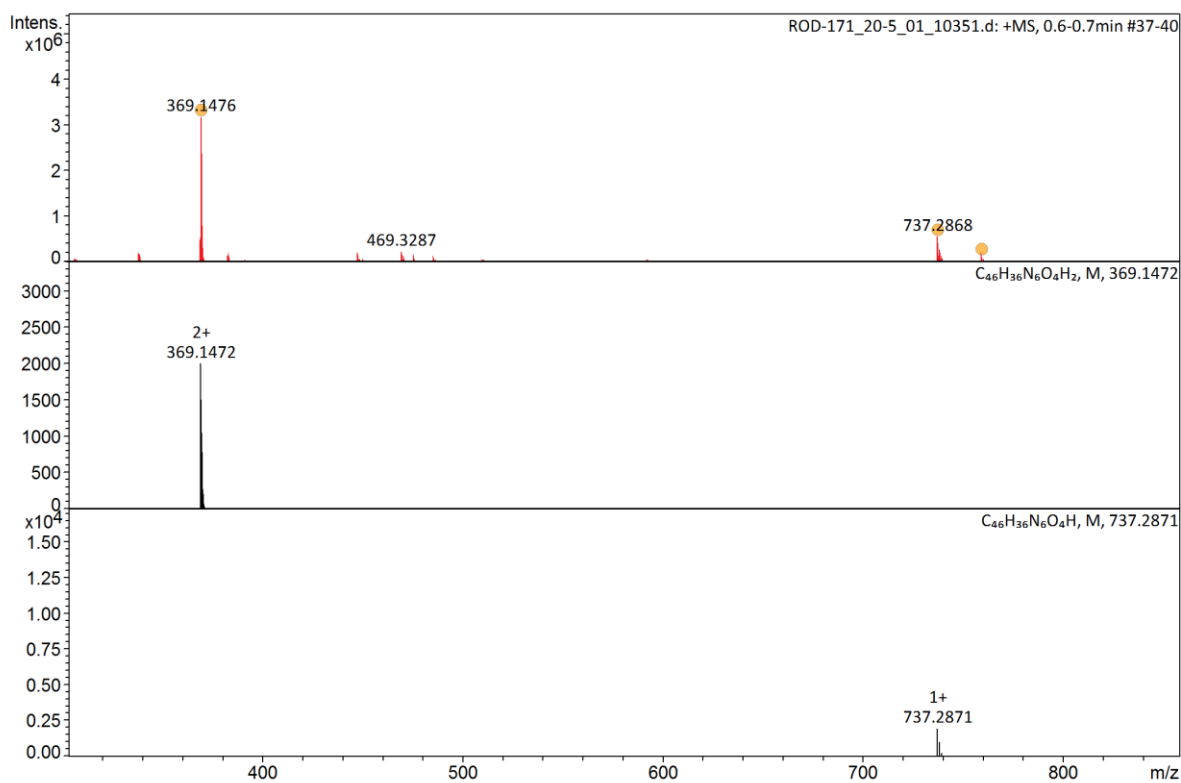

Figure S16. The  $[M+2H]^{2+}$  and  $[M+H]^+$  peaks in the high resolution electrospray mass spectrum of 6. Top, experimental; bottom, simulated.



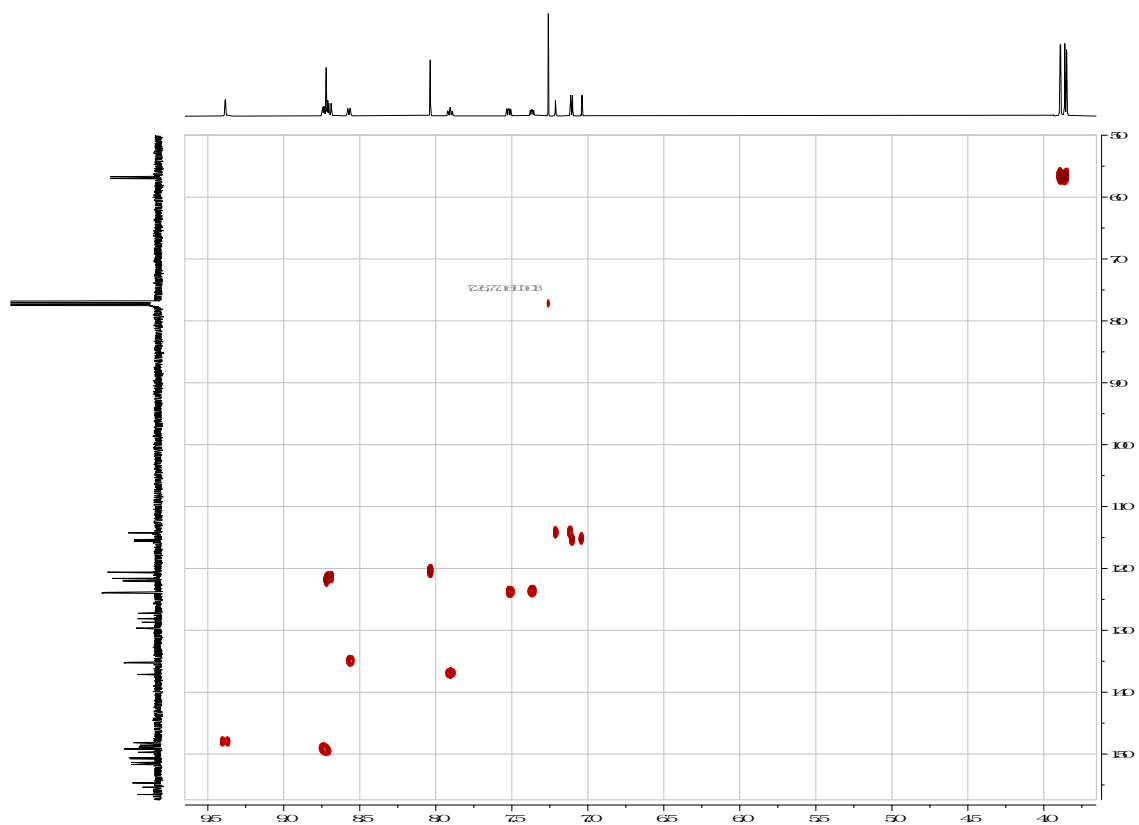

Figure S17. HMBC spectrum of **5** ( $^1\text{H}$  500 MHz,  $^{13}\text{C}$  126 MHz,  $\text{CDCl}_3$ , 298 K).

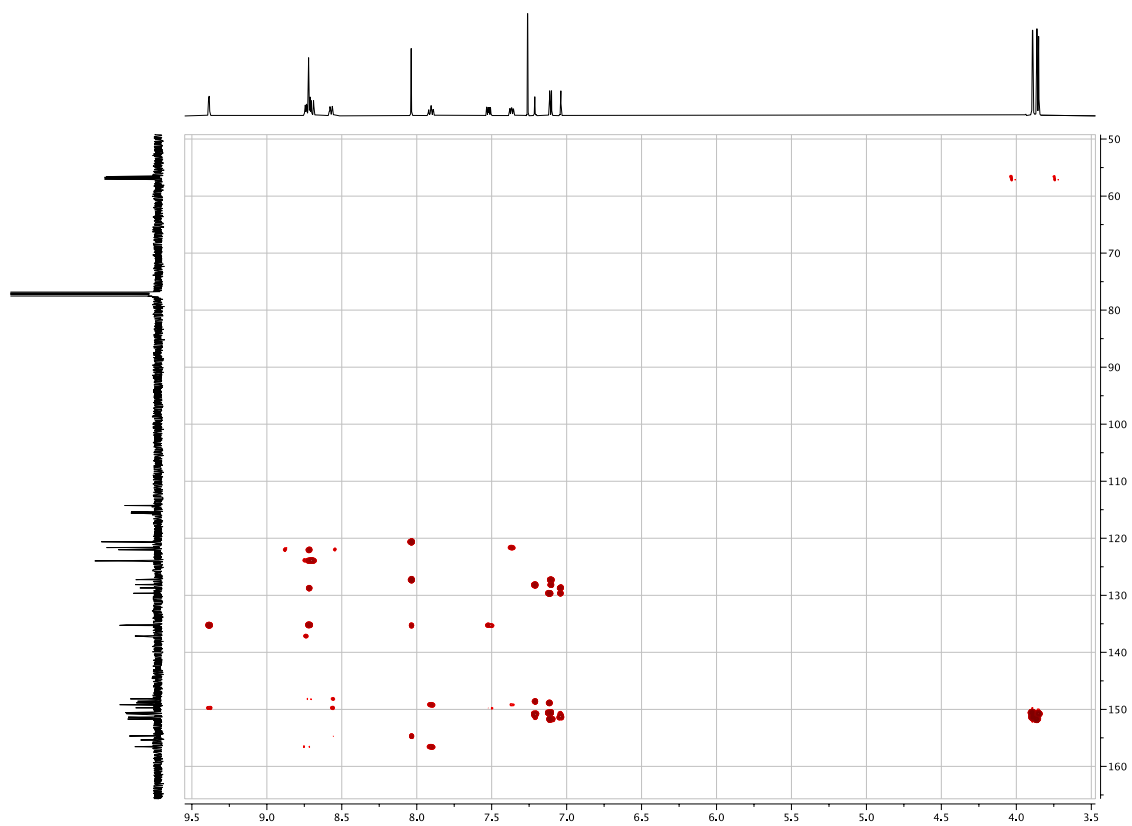

Figure S18. HMBC spectrum of **5** ( $^1\text{H}$  500 MHz,  $^{13}\text{C}$  126 MHz,  $\text{CDCl}_3$ , 298 K).

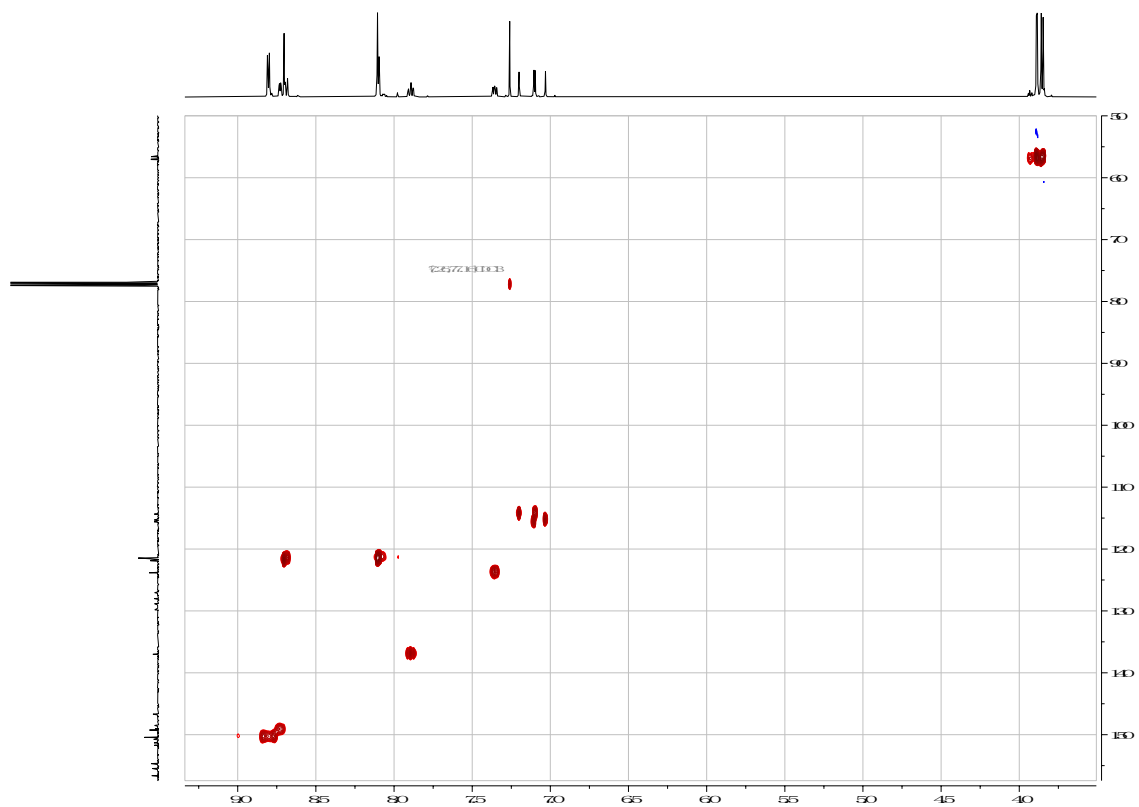

Figure S19. HMQC spectrum of 6 ( $^1\text{H}$  500 MHz,  $^{13}\text{C}$  126 MHz,  $\text{CDCl}_3$ , 298 K).

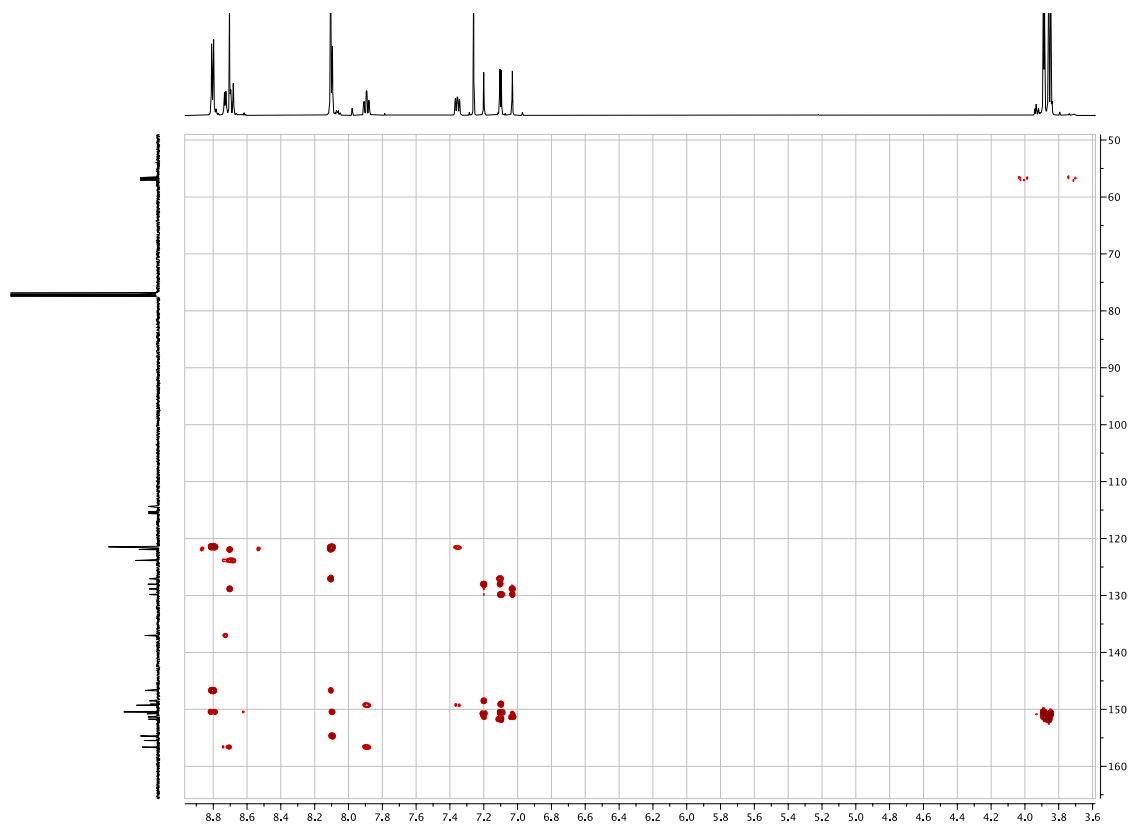

Figure S20. HMBC spectrum of 6 ( $^1\text{H}$  500 MHz,  $^{13}\text{C}$  126 MHz,  $\text{CDCl}_3$ , 298 K).

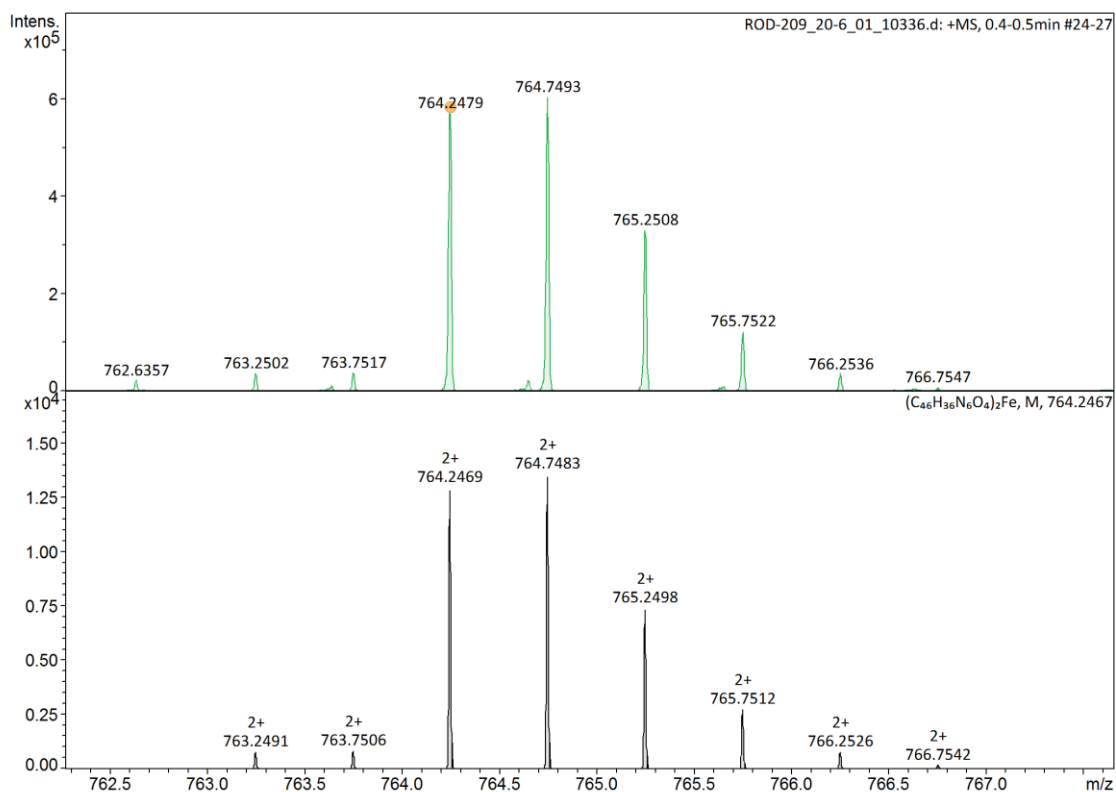

Figure S21. The  $[\text{M}]^{2+}$  peak in the high resolution electrospray mass spectrum of  $[\text{Fe}(\text{5})_2][\text{NO}_3]_2$ : top, experimental spectrum; bottom, simulated spectrum.

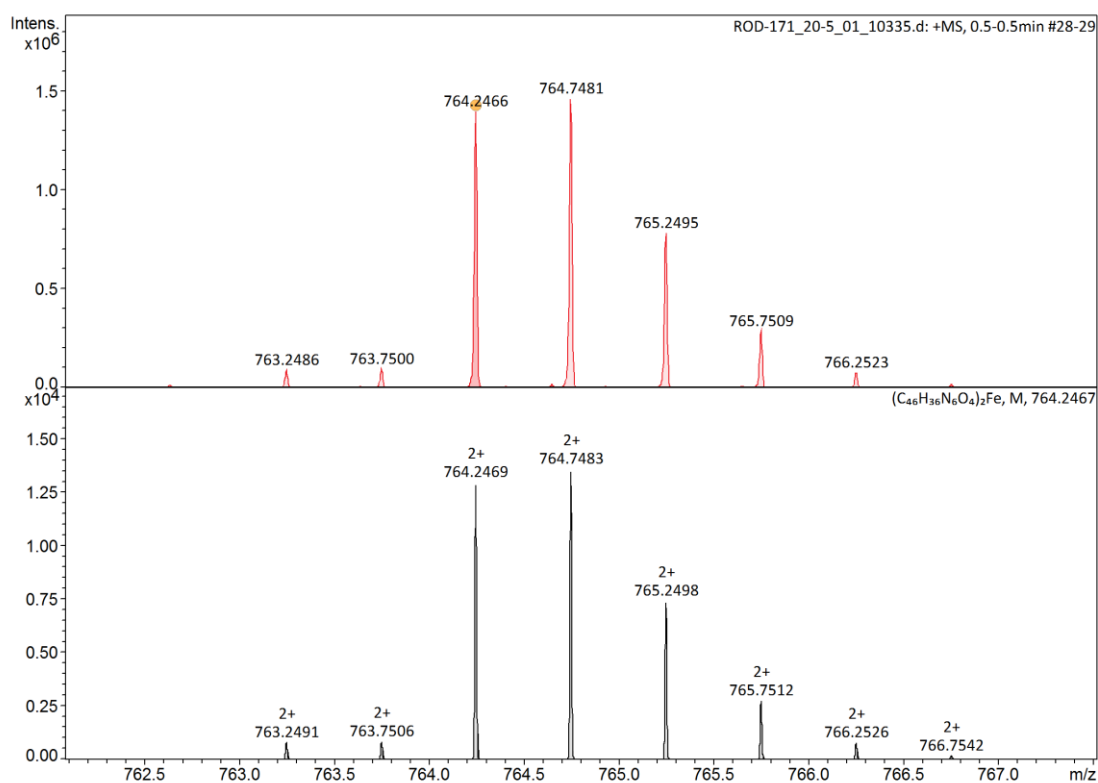

Figure S22. The  $[\text{M}]^{2+}$  peak in the high resolution electrospray mass spectrum of  $[\text{Fe}(\text{6})_2][\text{BF}_4]_2$ : top, experimental spectrum; bottom, simulated spectrum.

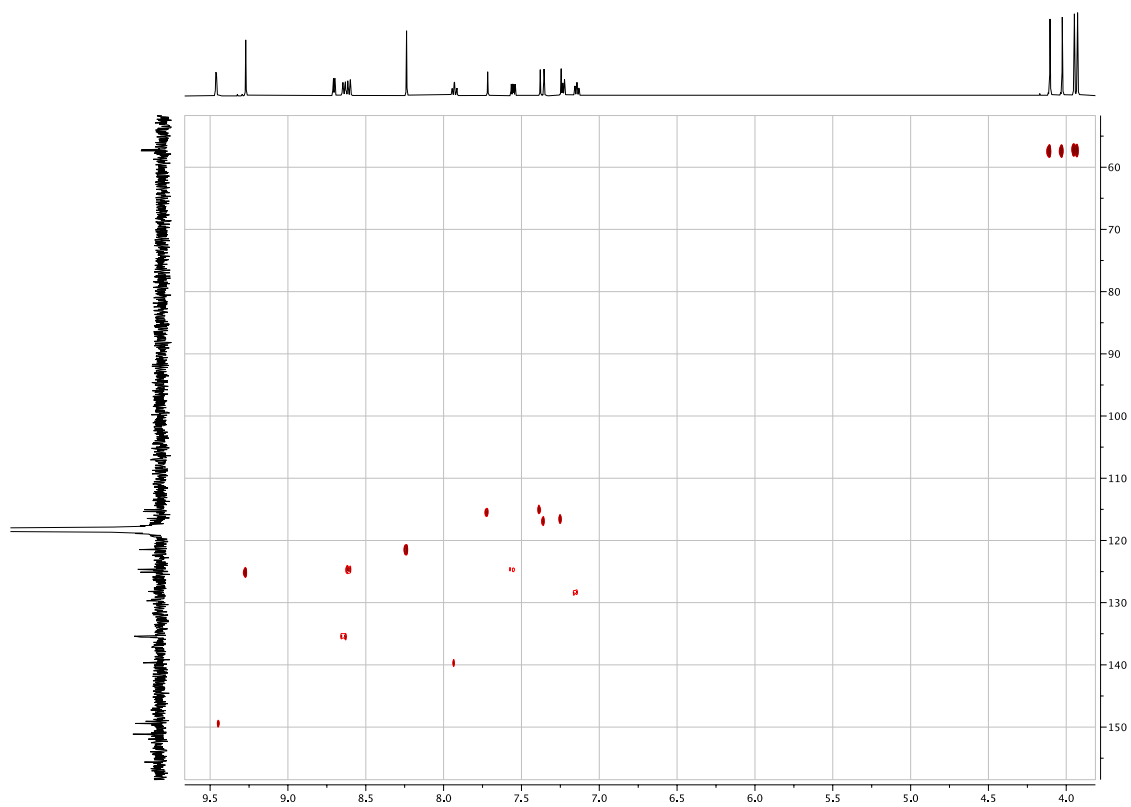

Figure S23. HMQC spectrum of  $[\text{Fe}(\mathbf{5})_2][\text{NO}_3]_2$  ( $^1\text{H}$  500 MHz,  $^{13}\text{C}$  126 MHz,  $\text{CD}_3\text{CN}$ , 298 K).

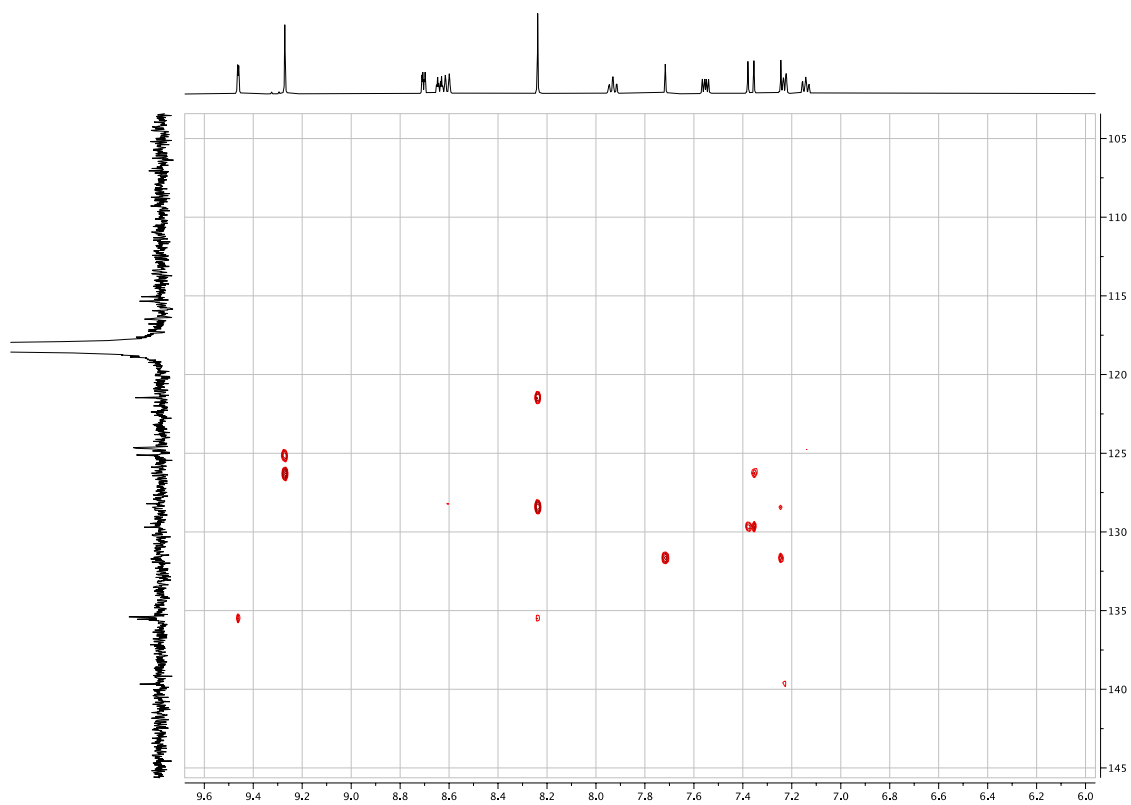

Figure S24. HMBC spectrum of  $[\text{Fe}(\mathbf{5})_2][\text{NO}_3]_2$  ( $^1\text{H}$  500 MHz,  $^{13}\text{C}$  126 MHz,  $\text{CD}_3\text{CN}$ , 298 K).

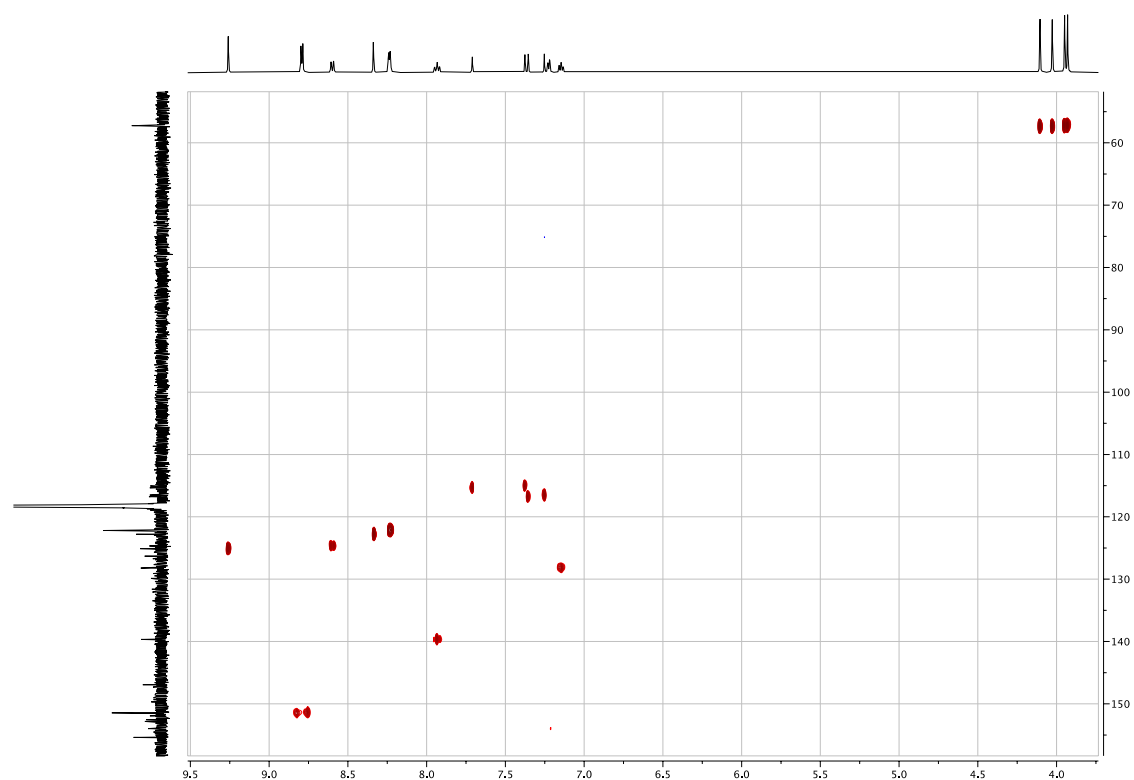

Figure S25. HMQC spectrum of  $[\text{Fe}(\mathbf{6})_2][\text{BF}_4]_2$  ( $^1\text{H}$  500 MHz,  $^{13}\text{C}$  126 MHz,  $\text{CD}_3\text{CN}$ , 298 K).  $^{13}\text{C}\{^1\text{H}\}$  signal at d 118.26 ppm arises from  $\text{CD}_3\text{CN}$ .

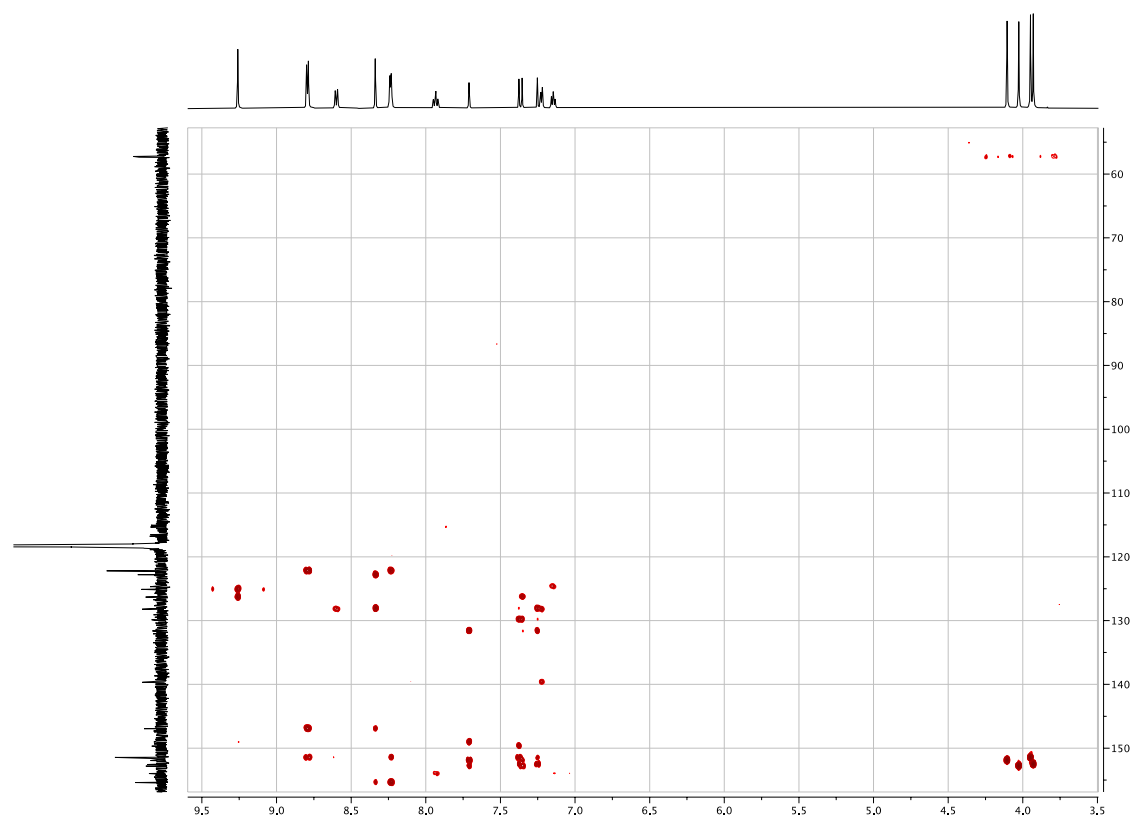

Figure S26. HMBC spectrum of  $[\text{Fe}(\mathbf{6})_2][\text{BF}_4]_2$  ( $^1\text{H}$  500 MHz,  $^{13}\text{C}$  126 MHz,  $\text{CD}_3\text{CN}$ , 298 K).  $^{13}\text{C}\{^1\text{H}\}$  signal at  $\delta$  118.26 ppm arises from  $\text{CD}_3\text{CN}$ .

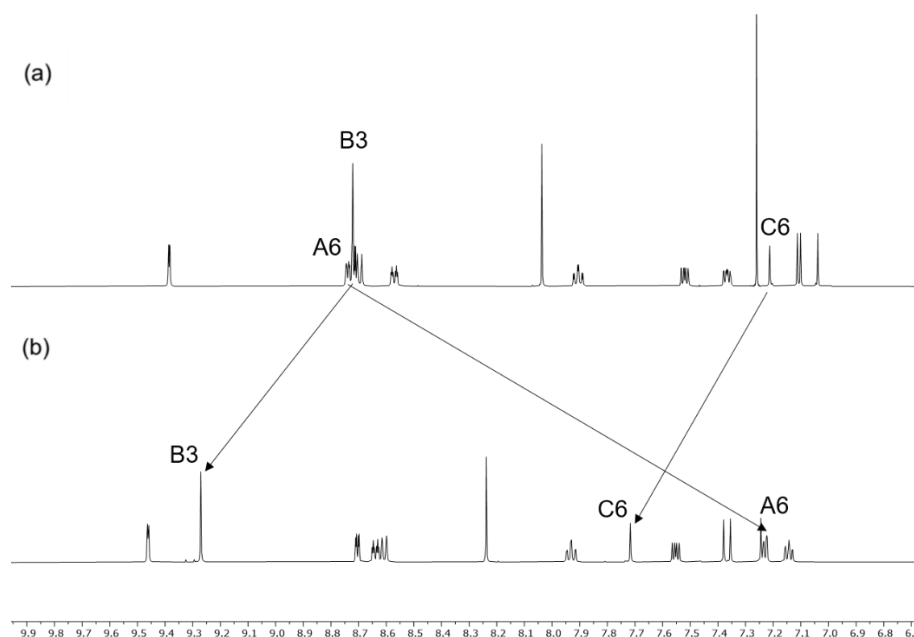

Figure S27. Comparison of the aromatic regions of the  $^1\text{H}$  NMR spectra (500 MHz, 298 K) of (a) compound **5** in  $\text{CDCl}_3$ , and (b)  $[\text{Fe}(\mathbf{5})_2][\text{NO}_3]_2$  in  $\text{CD}_3\text{CN}$ . The effect of coordination on the chemical shifts of the signals for protons  $\text{H}^{\text{A6}}$ ,  $\text{H}^{\text{B3}}$  and  $\text{H}^{\text{C6}}$  (see Scheme 5 for atom labels) is highlighted.

## Reference

1. Bruno, I.J.; Cole, J.C.; Edgington, P.R.; Kessler, M.; Macrae, C.F.; McCabe, P.; Pearson, J.; Taylor, R. New software for searching the Cambridge Structural Database and visualising crystal structures. *Acta Cryst.* **2002**, *B58*, 389-397. doi: 10.1107/S0108768102003324
